# Supplementary material for: Sand/carbon composites as low-cost lithium storage materials with superior electrochemical performance
Source: Royal Society of Chemistry journal article supplement (doi:10.1039/c9nj00424f), 2019-01-01
Supplement: c9nj00424f1.pdf [file c9nj00424f1.pdf]

## Supplementary Materials

### **Sand/carbon composites as low-cost lithium storage materials with superior electrochemical performance**

Yangfeng Wang,<sup>†</sup> Luoting Zhou,<sup>†</sup> Chu Liang,\* Jun Zhang, Hui Huang, Yongping Gan, Yang Xia, Xinyong Tao, Wenkui Zhang\*

College of Materials Science and Engineering, Zhejiang University of Technology, Hangzhou 310014, People's Republic of China. E-mail: [cliang@zjut.edu.cn](mailto:cliang@zjut.edu.cn); [msechem@zjut.edu.cn](mailto:msechem@zjut.edu.cn).

<sup>†</sup> These authors contributed equally.

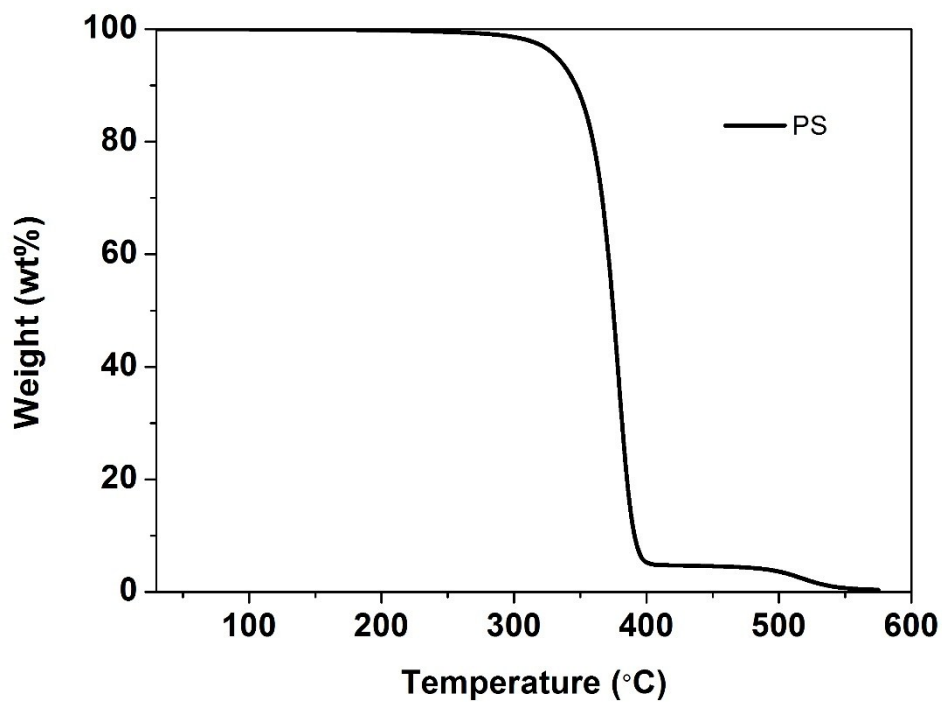

Fig. S1 TG curves of PS heated at a rate of  $5\text{ }^{\circ}\text{C min}^{-1}$  under Ar atmosphere

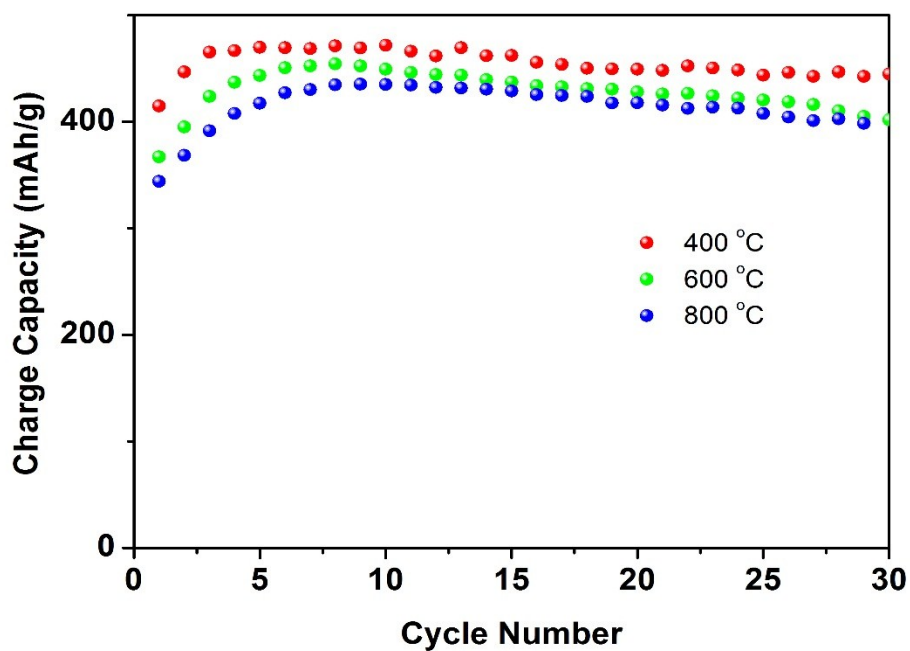

Fig. S2 Cycling performance of sand/carbon composite with 12 wt.% carbon at different temperature.

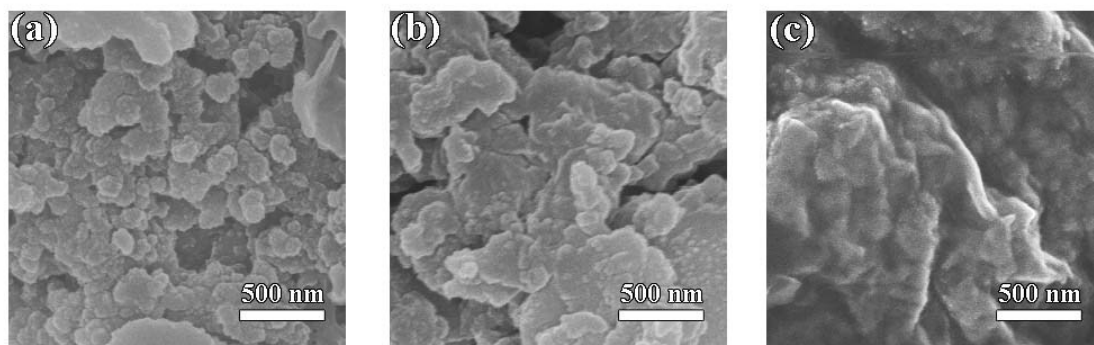

**Fig. S3** SEM images of the electrodes discharged/charged 200 cycles. (a) sand/carbon composite with 2 wt.% carbon; (b) sand/carbon composite with 5.5 wt.% carbon; (c) sand/carbon composite with 12 wt.% carbon.
